# Supplementary material for: Synthesis of large-area monolayer and few-layer MoSe2 continuous films by chemical vapor deposition without hydrogen assistance and formation mechanism
Source: Royal Society of Chemistry journal article supplement (doi:10.1039/d1nr00552a), 2021-01-01
Supplement: d1nr00552a1.pdf [file d1nr00552a1.pdf]

## Supporting Information

# Synthesis of Large-Area Monolayer and Few-Layer MoSe<sub>2</sub> Continuous Film by Chemical Vapor Deposition without Hydrogen assisted and Formation Mechanism

Hui Yan,<sup>†\*ab</sup> Tong Yu,<sup>†ab</sup> Heng Li,<sup>cd</sup> Zhuocheng Li,<sup>ab</sup> Haitao Tang,<sup>a</sup> Hangwei Hu,<sup>a</sup>

Hao Yu<sup>ab</sup> and Shougen Yin<sup>\*ab</sup>

<sup>a</sup> Tianjin Key Laboratory of Photoelectric Materials and Devices, School of Materials Science and Engineering, Tianjin University of Technology, Tianjin 300384, China. E-mail: yanhui581@163.com, yanhui@tjut.edu.cn, sgyin@tjut.edu.cn.

<sup>b</sup> Key Laboratory of Display Materials and Photoelectric Devices, National Demonstration Center for Experimental Function Materials Education, Institute of Functional Crystal, Tianjin University of Technology, Ministry of Education, Tianjin 300384, China.

<sup>c</sup> Fujian Provincial Key Laboratory of Semiconductors and Applications, Collaborative Innovation Center for Optoelectronic Semiconductors and Efficient Devices, Department of Physics, Xiamen University, Xiamen 361005, China.

<sup>d</sup> Jiujiang Research Institute of Xiamen University, Jiujiang 332000, China.

<sup>†</sup> These authors contributed equally to this work.

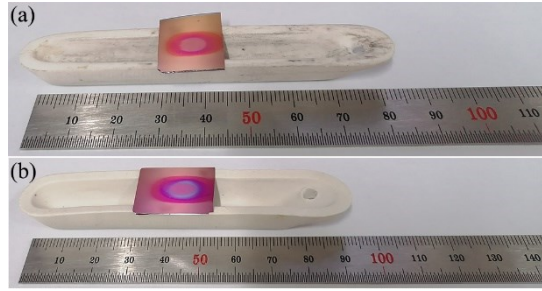

Fig. S1 Photographs of the typical MoSe<sub>2</sub> films grown on Si/SiO<sub>2</sub> substrates by using different sizes of alumina boat (a) 86×13×9.0 mm, (b) 95×17×11 mm.

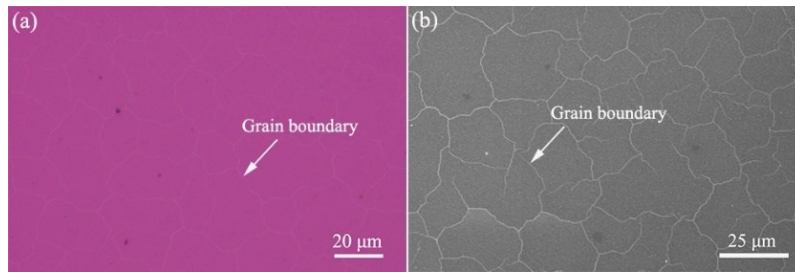

Fig. S2 (a) OM and (b) SEM image of the grain boundaries of monolayer MoSe<sub>2</sub> film.

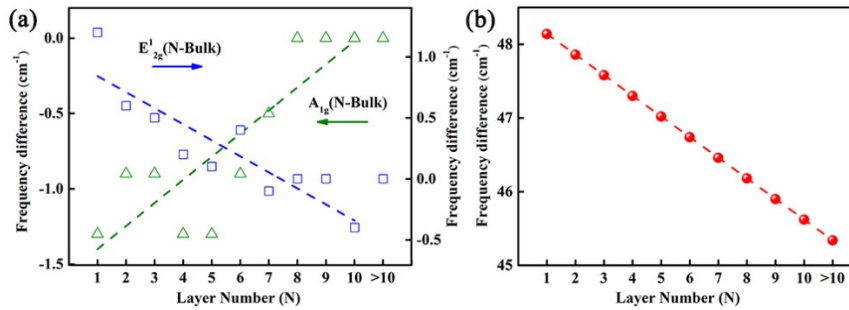

Fig. S3 (a) The frequency differences between the different layer and the bulk for the Raman mode  $A_{1g}$  and  $E_{2g}^1$  as a function of number of layers ( $N$ ). The dashed lines are the linear fittings.

(b) The frequency differences between the between  $E_{2g}^1$  and  $A_{1g}$  mode calculated by the simulated two formulas in (a) for different layers. The dashed lines are the fitting line in the main text.

The frequency differences between the different layer and the bulk for the Raman mode  $A_{1g}$  and  $E_{2g}^1$  as a function of number of layers ( $N$ ) are illustrated in Fig. S3(a). For  $A_{1g}$  mode, the frequency difference  $\Delta\omega(A_{1g})$  of ML MoSe<sub>2</sub> ( $N=1-10L$ ) can be expressed as  $\Delta\omega(A_{1g}) = 0.15N - 1.55$  and the

value of Adj. R-Square is 0.68. For  $E_{2g}^1$  mode, the frequency difference  $\Delta\omega(E_{2g}^1)$  of  $NL$  MoSe<sub>2</sub> ( $N=1-10L$ ) can be expressed as  $\Delta\omega(E_{2g}^1) = -0.13N+0.97$  and the Adj. R-Square is 0.76. The two values of the Adj. R-Square are both smaller than 0.89 in the main text. As shown in Fig. S3(b), the frequency differences between  $E_{2g}^1$  and  $A_{1g}$  calculated by the above simulated two formulas are the same as the simulation of the main text.

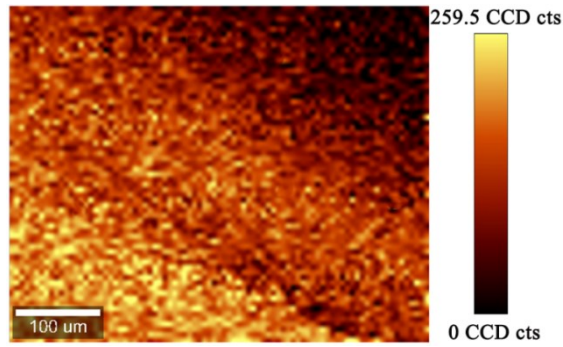

Fig. S4 Peak intensity mapping of Raman mode  $A_{1g}$  obtained from monolayer (bottom left) to multilayer (top right) MoSe<sub>2</sub> film.

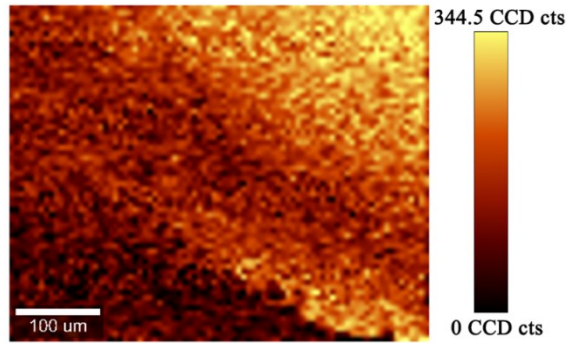

Fig. S5 Raman intensity map of D peak obtained from monolayer (bottom left) to multilayer (top right) MoSe<sub>2</sub> film.

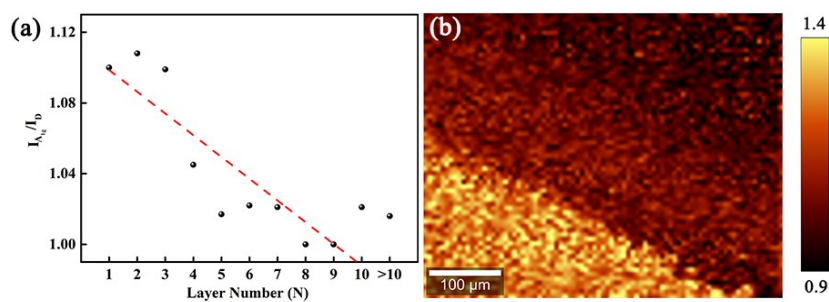

Fig. S6 (a) The peak intensity ratio of  $A_{1g}/D$  as function of the layer numbers. The dashed line is guide to the eyes. (b) The mapping of the peak intensity ratio of  $A_{1g}/D$  from monolayer (bottom left) to multilayer (top right)  $\text{MoSe}_2$  film.

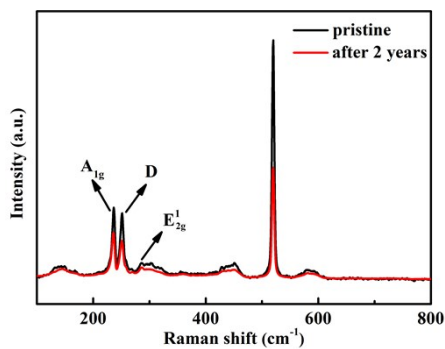

Fig. S7 The Raman spectra of the  $\text{MoSe}_2$  monolayer freshly prepared and stored for two years.

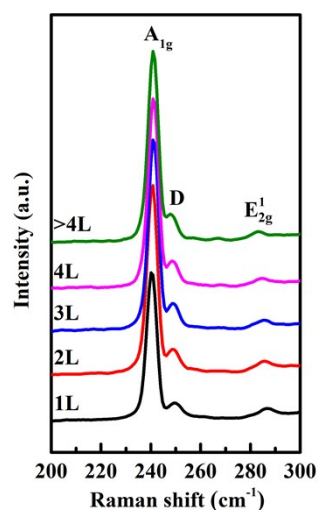

Fig. S8 The Raman spectra of the  $\text{MoSe}_2$  film with different number of layers synthesized with 1mg  $\text{MoO}_3$  and 50 mg Se power as precursors.

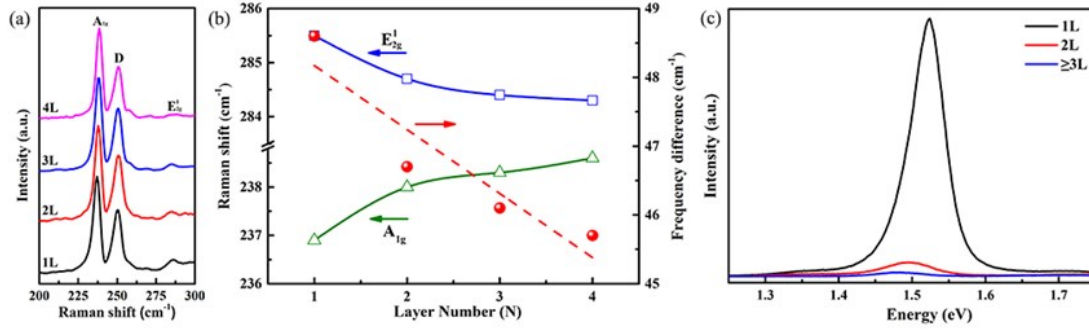

Fig. S9 Spectral analysis of another MoSe<sub>2</sub> film synthesized by APCVD method. (a) Raman spectra of MoSe<sub>2</sub> film with different number of layers. Labels indicate the corresponding number of layers. (b) Frequency ( $\omega$ ) of  $E_{2g}^1$  and  $A_{1g}$  and the frequency difference ( $\Delta\omega$ ) between  $E_{2g}^1$  and  $A_{1g}$  as a function of number of layers ( $N$ ). (c) PL spectra of monolayer, bilayer and multilayer MoSe<sub>2</sub>.

Spectral analysis of another MoSe<sub>2</sub> film synthesized by APCVD method is shown in Fig. S9. Fig. S9(a) shows the Raman spectra of MoSe<sub>2</sub> film with different number of layers ( $N=1-4L$ ). The frequency ( $\omega$ ) of  $E_{2g}^1$  and  $A_{1g}$  and the frequency difference ( $\Delta\omega$ ) between  $E_{2g}^1$  and  $A_{1g}$  as a function of number of layers ( $N$ ) are shown in Fig. S9(b). The position of  $E_{2g}^1$  and  $A_{1g}$  show opposite trends with increasing thickness from 1L to 4L. The  $A_{1g}$  Raman mode shows a blue shift while the  $E_{2g}^1$  Raman mode exhibits a redshift. The frequency difference between  $A_{1g}$  and  $E_{2g}^1$  decreases gradually with the increase of MoSe<sub>2</sub> film layers as shown in Fig. 9S(b), and the frequency difference  $\Delta\omega(E_{2g}^1 - A_{1g})$  of  $NL$  MoSe<sub>2</sub> ( $N=1-4L$ ) can be expressed as  $\Delta\omega(E_{2g}^1 - A_{1g}) = 49.0 - 0.9N$ . Fig. S9(c) shows the PL spectra of monolayer, bilayer and multilayer MoSe<sub>2</sub>. As the thickness of MoSe<sub>2</sub> film increased the PL peak shows redshifted. And the PL intensities of bilayer and multilayer regions are significantly reduced compared to that of the monolayer. These spectral analysis results are similar to those in the main text.

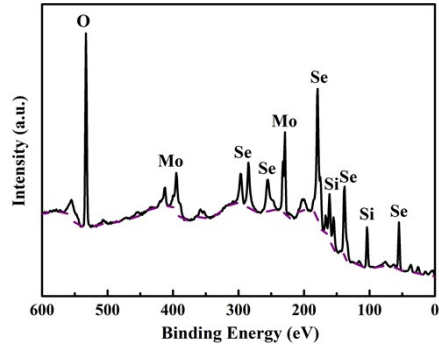

Fig. S10 XPS spectrum of the sample. Four elements are present: Mo and Se (from the  $\text{MoSe}_2$  film), Si and O (from the substrate).
